# Supplementary material for: Establishing Molecular Subgroups of CD8+ T Cell-Associated Genes in the Ovarian Cancer Tumour Microenvironment and Predicting the Immunotherapy Response
Source: MDPI journal article supplement (doi:10.3390/biomedicines11092399), 2023-08-28
Supplement: s1 [file s1]

**Establishing Molecular Subgroups of CD8+ T Cell-Associated Genes in the Ovarian Cancer Tumour Microenvironment and Predicting the Immunotherapy Response**

**Supplementary Table S2. Primer sequences for qRT-PCR analysis.**

|          |                          |
|----------|--------------------------|
| TXK-F    | GATGGGCAGTTGTTTACCAGCC   |
| TXK-R    | ATGGACCACTCCAAACTGACCG   |
| STX7-F   | CGAGTAAGAGCCAGTTCCAGAG   |
| STX7-R   | TGAATAAGACGGAGGTCATCCTC  |
| SEMA4F-F | GCAGGATGTTGCTGTGCTTCGA   |
| SEMA4F-R | CTGTCCGAATGTCTTGTTGCTCG  |
| HEMGN-F  | GAACCTGGAGTTTGAGAAACAGAG |
| HEMGN-R  | CCTGTTCTCTGCTGCTTGCGTT   |

**Supplementary Table S3. Clinical information on 10 patients with OC used for immunohistochemistry**

| <b>Clinical characteristics</b>  | <b>N (%)</b> |
|----------------------------------|--------------|
| <b>Age</b>                       |              |
| <60                              | 7 (70%)      |
| >60                              | 3 (30%)      |
| <b>Pathological type</b>         |              |
| high grade serous ovarian cancer | 10 (100%)    |
| <b>Clinical Stages</b>           |              |
| <b>III</b>                       | 7 (70%)      |
| <b>IV</b>                        | 3 (30%)      |
