# Supplementary material for: Establishing Molecular Subgroups of CD8+ T Cell-Associated Genes in the Ovarian Cancer Tumour Microenvironment and Predicting the Immunotherapy Response
Source: MDPI journal article supplement (doi:10.3390/biomedicines11092399), 2023-08-28
Supplement: s1 [file s1]

**Accounting for CD8+ T cell behaviour in tumour microenvironment helps predicting immunotherapy response in ovarian cancer**

Supplementary Table S1. The sequence of primers

|          |                          |
|----------|--------------------------|
| TXK-F    | GATGGGCAGTTGTTTACCAGCC   |
| TXK-R    | ATGGACCACTCCAAACTGACCG   |
| STX7-F   | CGAGTAAGAGCCAGTTCCAGAG   |
| STX7-R   | TGAATAAGACGGAGGTCATCCTC  |
| SEMA4F-F | GCAGGATGTTGCTGTGCTTCGA   |
| SEMA4F-R | CTGTCCGAATGTCTTGTGGTCG   |
| HEMGN-F  | GAACCTGGAGTTTGAGAAACAGAG |
| HEMGN-R  | CCTGTTCTCTGCTGCTTGCGTT   |
